# Supplementary material
Source: PubMed Central journal article supplement (PMC5110206)
Supplement: NIHMS823128-supplement-Supplemental_Table.pdf [file NIHMS823128-supplement-Supplemental_Table.pdf]

## Supplementary Online Content

Nagel MA, White T, Khmeleva N, et al. Analysis of varicella-zoster virus in temporal arteries biopsy positive and negative for giant cell arteritis. *JAMA Neurol*. Published online September 8, 2015. doi:10.1001/jamaneurol.2015.2101.

**eTable.** VZV Antigen Distribution in Adventitia of TAs Pathologically Positive and Negative for GCA and in Normal TAs

This supplementary material has been provided by the authors to give readers additional information about their work.

**eTable.** VZV Antigen Distribution in Adventitia of TAs Pathologically Positive and Negative for GCA and in Normal TAs

| VZV Antigen in Adventitia | Temporal Arteries |      |        |
|---------------------------|-------------------|------|--------|
|                           | GCA+              | GCA- | Normal |
| Nerve bundle              | 25%               | 37%  | 19%    |
| Vasa vasorum              | 4%                | 4%   | 9%     |
| Adventitial cells         | 72%               | 59%  | 72%    |
